# Supplementary material for: Mechanically-sensitive miRNAs bias human mesenchymal stem cell fate via mTOR signalling
Source: PubMed Central journal article supplement (PMC5772625; doi:10.1038/s41467-017-02486-0), 2018-01-17
Supplement: 41467_2017_2486_MOESM1_ESM.pdf [file 41467_2017_2486_MOESM1_ESM.pdf]

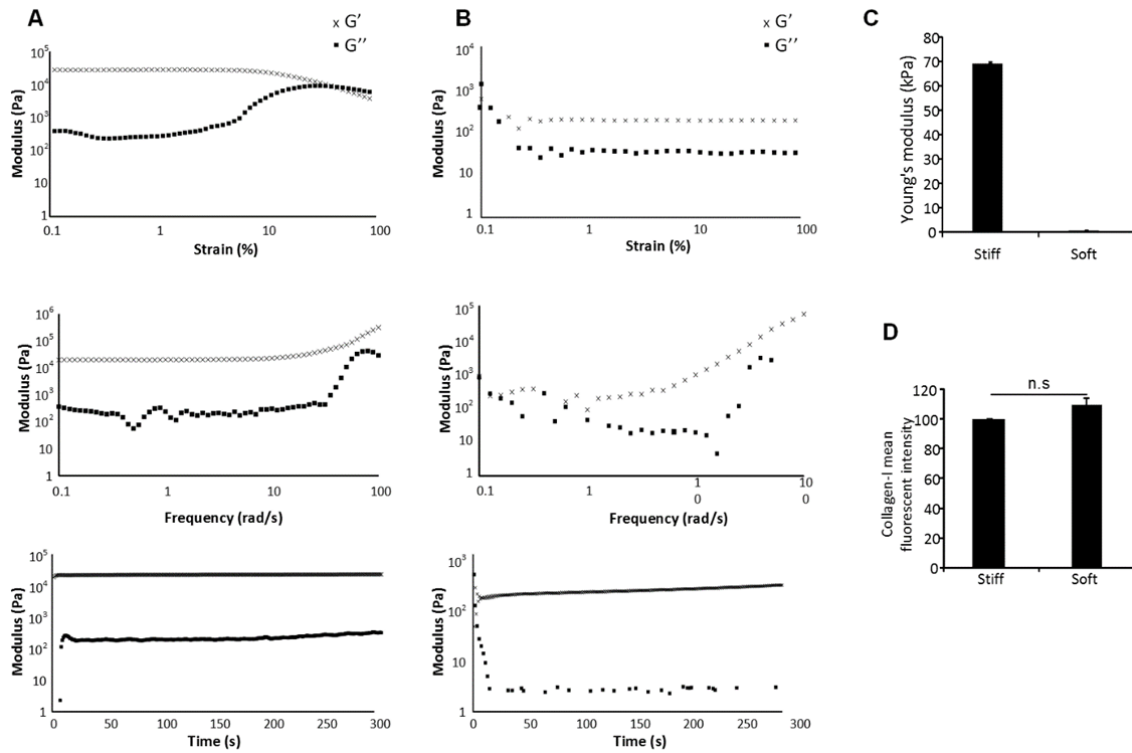

1

2 **Supplementary Figure 1. Rheological characterization of polyacrylamide (PAM) gels.**  
 3 Strain, frequency and time sweeps of **A)** stiff and **B)** soft PAM gels showing storage ( $G'$ ) and  
 4 loss ( $G''$ ) moduli. **C)** Young's modulus of soft and stiff PAM gels. Data is shown as mean  $\pm$   
 5 SEM for  $n=12$ . **D)** Mean fluorescent intensity of collagen-I immunolocalisation. Data is  
 6 shown as mean  $\pm$  SEM for  $n>15$  images taken across 3 separate gels.

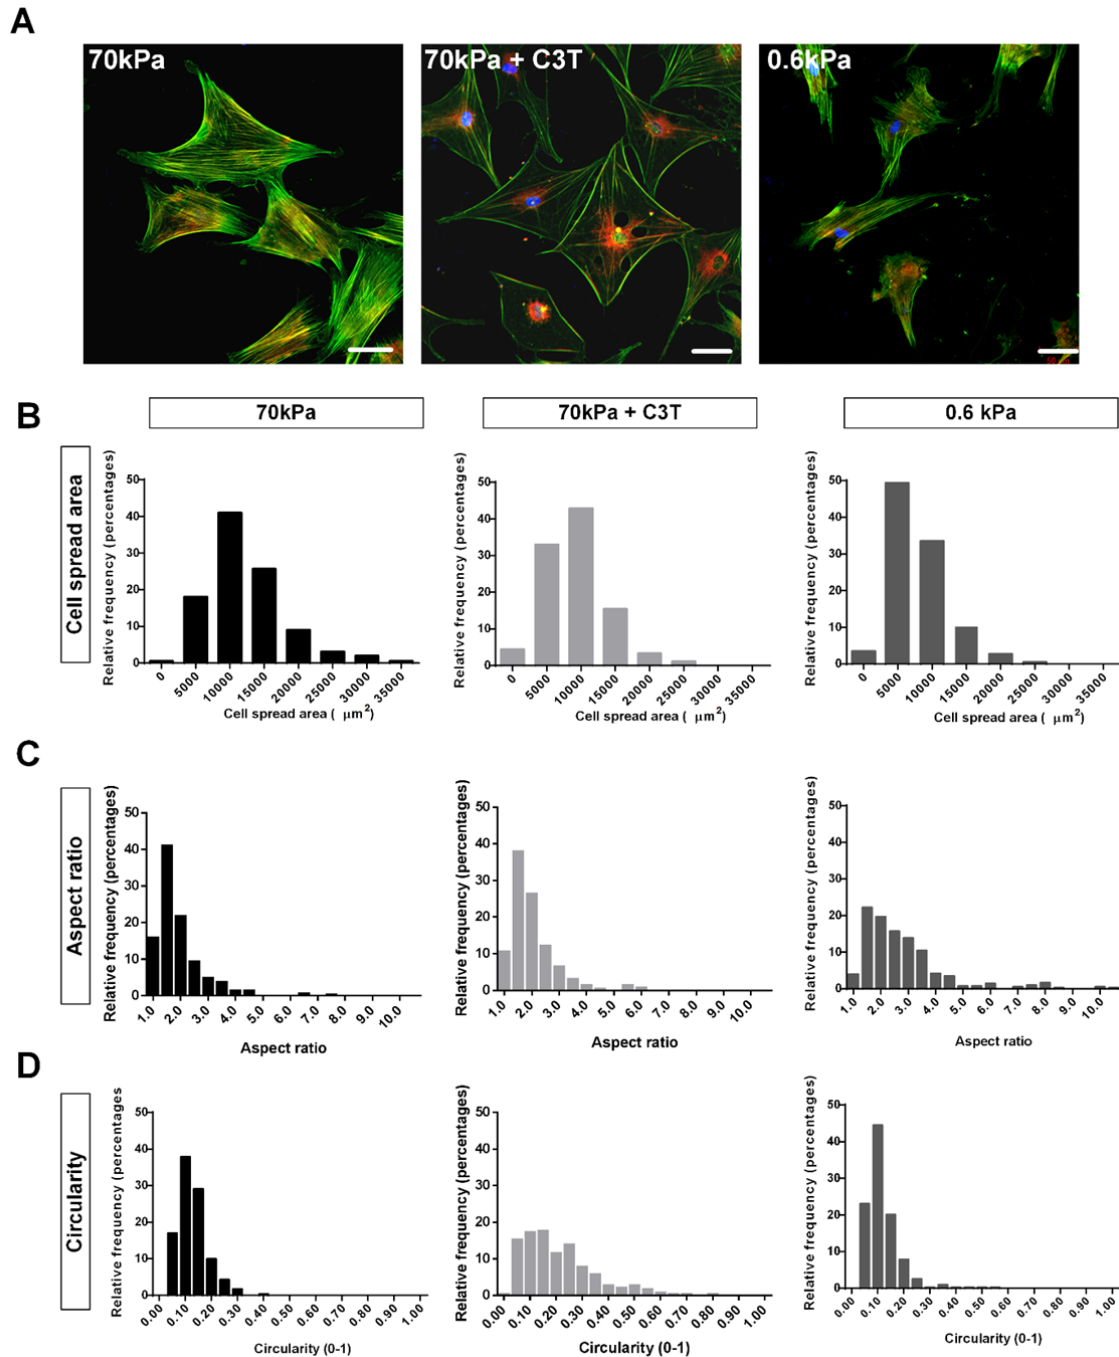

7  
 8 **Supplementary Figure 2. Analysis of morphology in response to substrate stiffness and**  
 9 **RhoA signalling. A) Staining of hMSC structure showing actin (green), nuclei (blue) and non-**  
 10 **muscle myosin II (red). Scale bar, 50  $\mu\text{m}$ . Histograms showing B) cell spread area, C) aspect**  
 11 **ratio and D) circularity for populations of >50 MSCs per condition.**

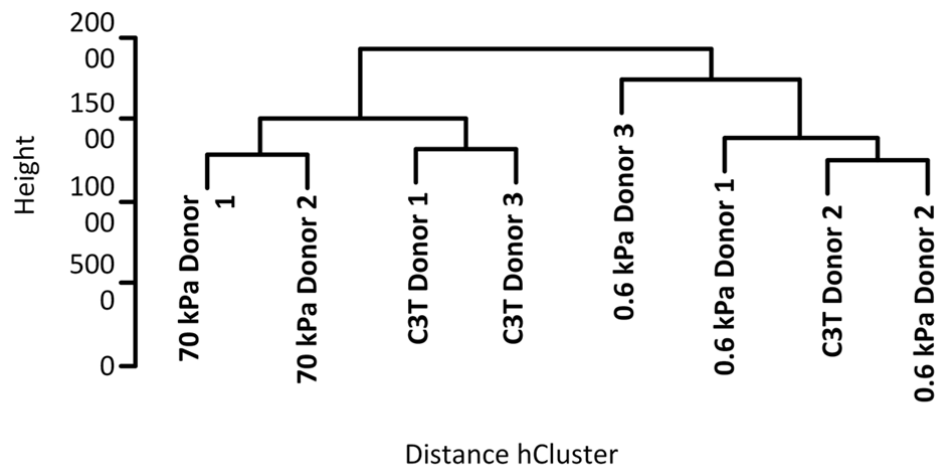

12

13 **Supplementary Figure 3. Hierarchical clustering of miRNA sequencing samples.**

14

15

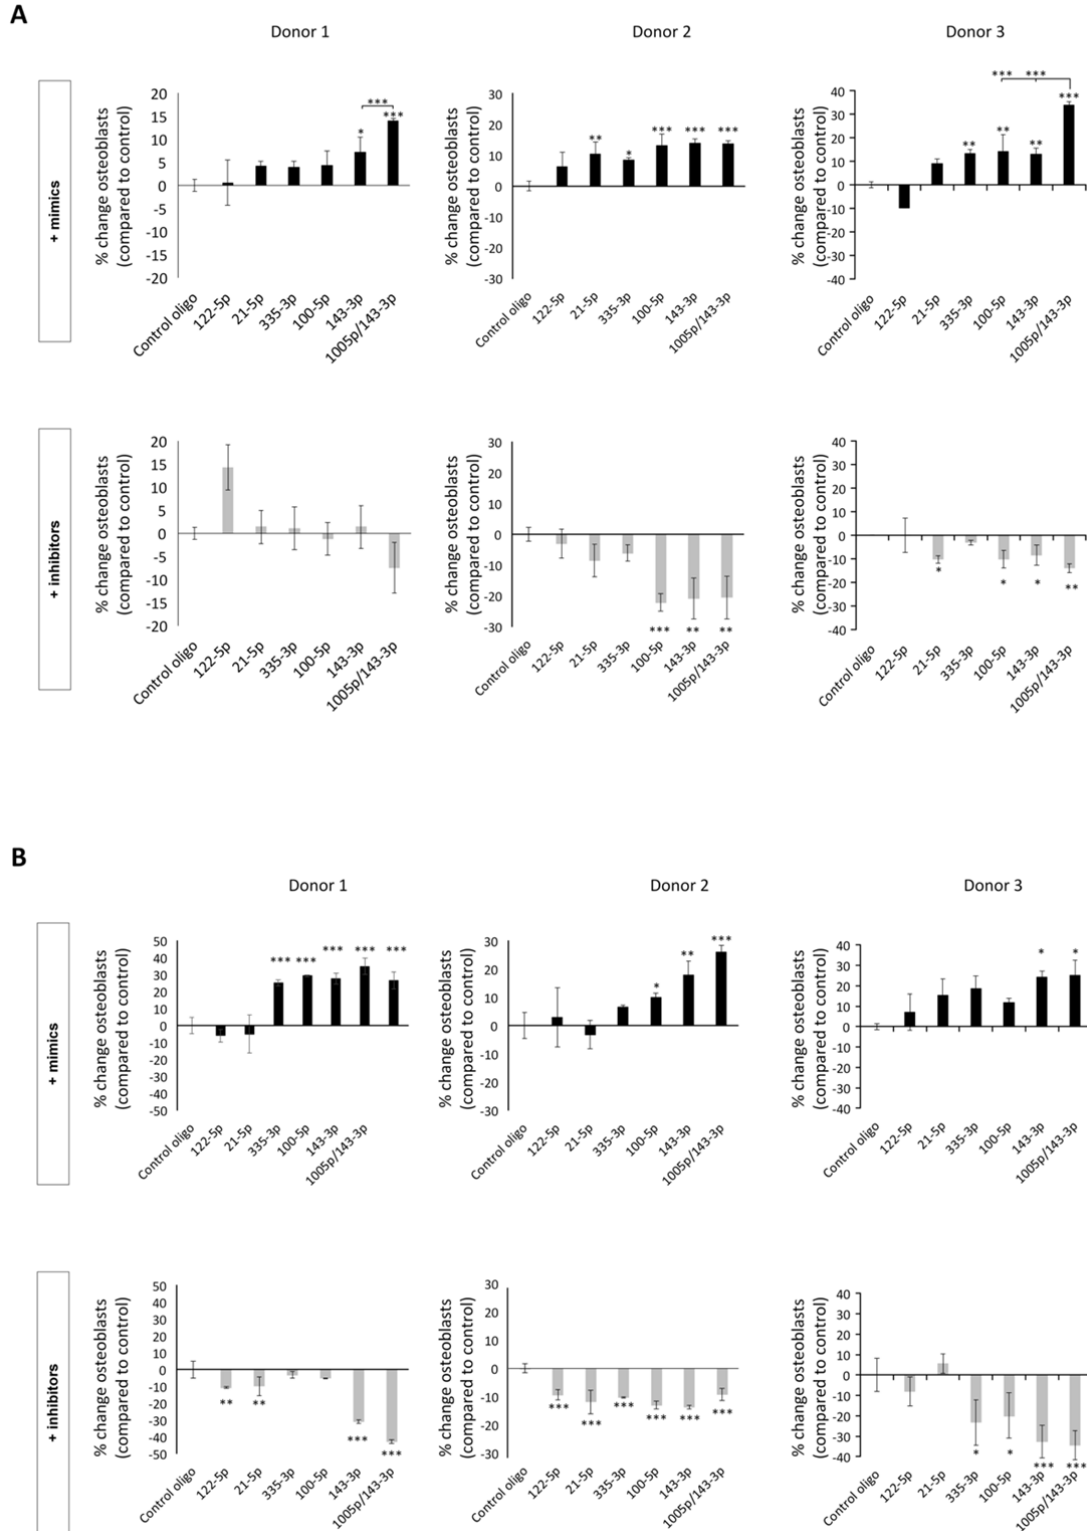

16

17 **Supplementary Figure 4. Effect of miRNA modulation on MSC differentiation bias for individual**  
 18 **MSC donors.** Effect of miRNA mimics and inhibitors on MSCs cultured on **A)** 70kPa and **B)** 0.6kPa  
 19 substrates. Data is shown as mean change in proportion of osteoblasts relative to control  $\pm$  SD.  
 20 Statistically different samples are denoted by  $p < 0.05$  (\*), 0.01 (\*\*), and 0.001 (\*\*\*).

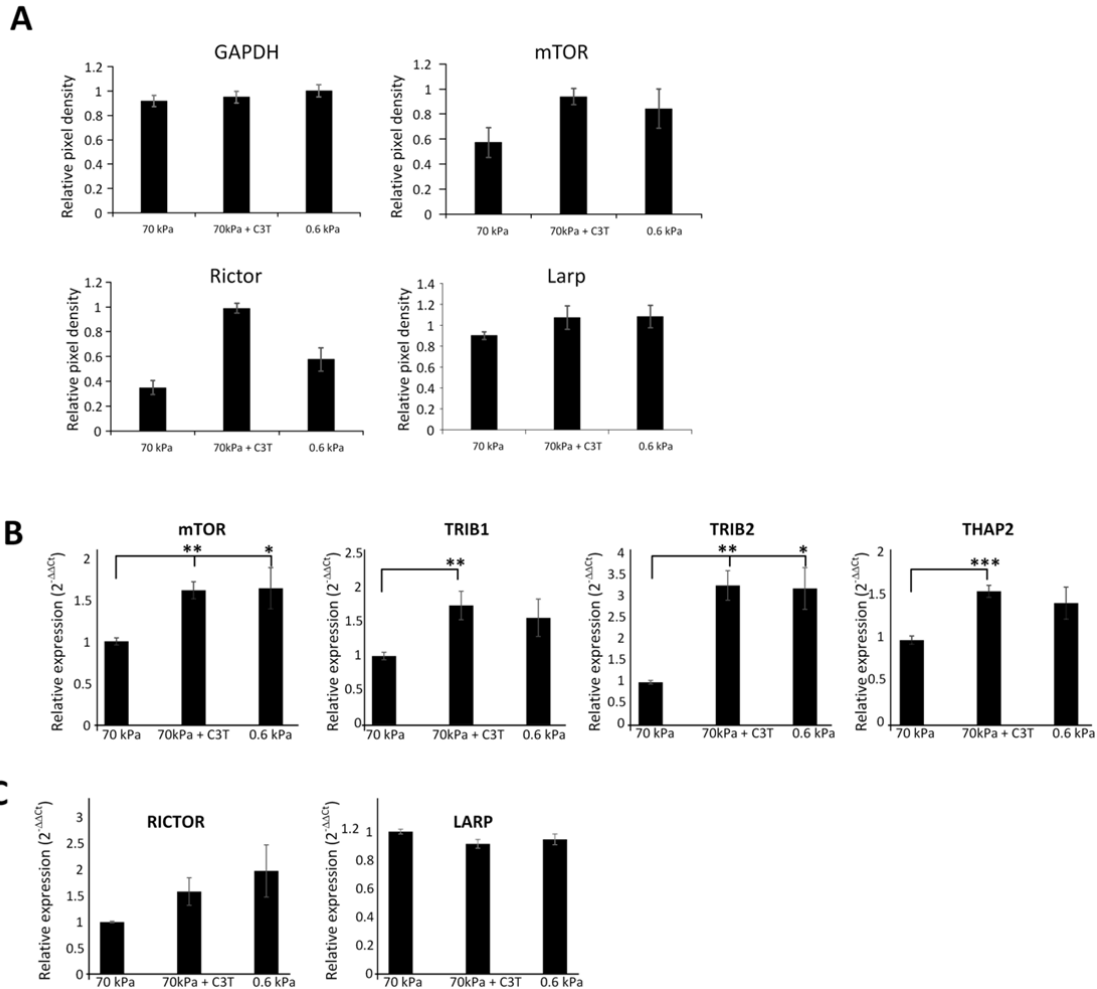

21

22

23 **Supplementary Figure 5. Expression analysis of mTOR pathway components in response to**  
 24 **substrate stiffness and RhoA signalling. A)** Quantification of proteins in MSCs cultured on  
 25 70 kPa, 70 kPa + C3T or 0.6 kPa substrates. Data are expressed as relative pixel density units,  
 26 all graphs show mean  $\pm$  SEM for 3 independent hMSC donors. qPCR determination of the  
 27 relative expression of miRNA target genes for B) *miR-100-5p* and C) *miR-143-3p*. All data is  
 28 represented as mean  $\pm$  SEM relative to expression in 70 kPa samples. Statistically different  
 29 samples are denoted by  $p < 0.05$  (\*), 0.01 (\*\*), and 0.001 (\*\*\*)).

30

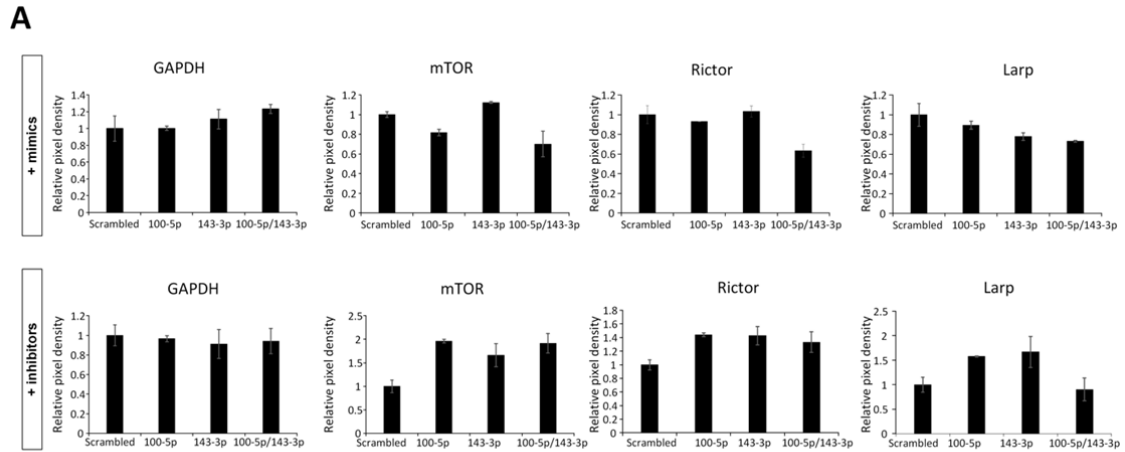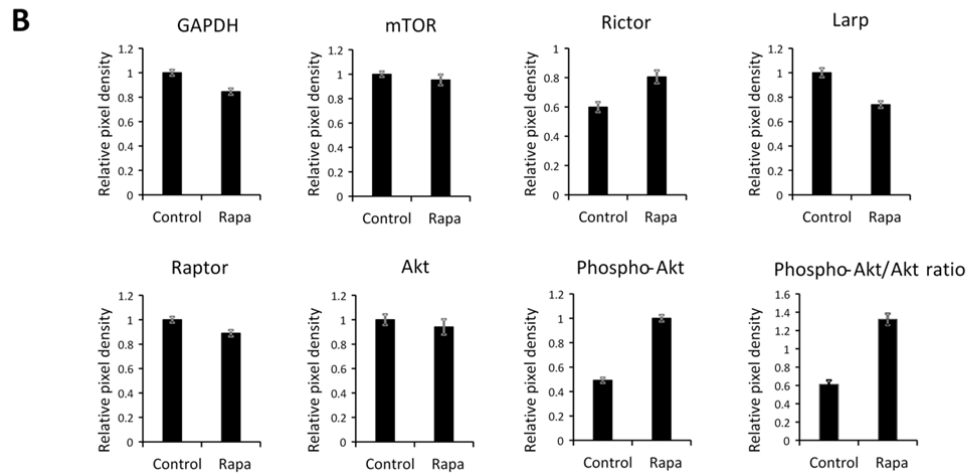

31

32

33 **Supplementary Figure 6. Expression analysis of mTOR pathway components in response to miRNA**  
 34 **mimics/inhibitors or rapamycin treatment.** Quantification of proteins in **A)** MSCs transfected  
 35 with miRNA mimics or inhibitors and **B)** MSCs treated with 50 nM rapamycin. Data are  
 36 expressed as relative pixel density units, all graphs show mean  $\pm$  SEM for 3 independent  
 37 hMSC donors.

38

39

40

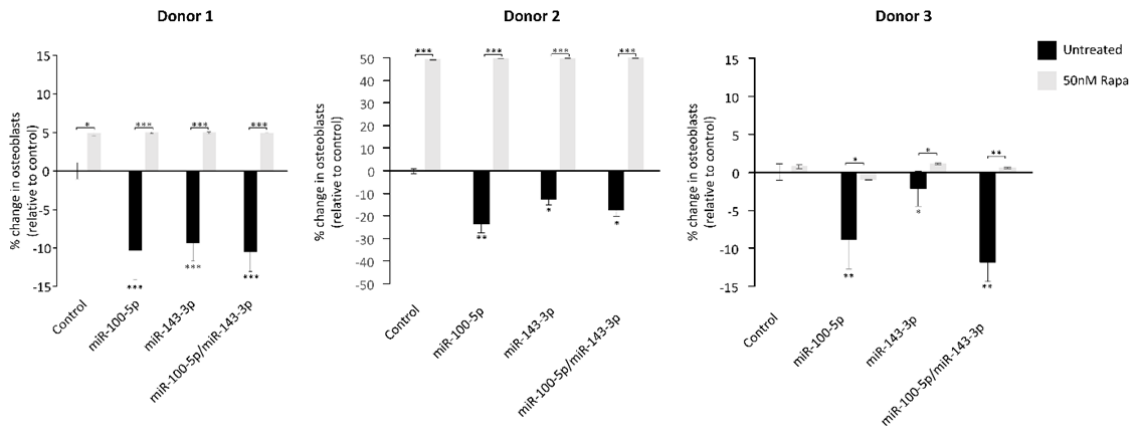

41

42 **Supplementary Figure 7. Opposing effects of miRNA inhibitors and Rapamycin on MSC**  
43 **differentiation bias.** Data shown for 3 independent MSC donors for untreated (black bars) and  
44 rapamycin treated (grey bars) MSCs. Data is shown as mean change in proportion of osteoblasts  
45 relative to control  $\pm$  SD. Statistically different samples are denoted by  $p < 0.05$  (\*), 0.01 (\*\*)  
46 and 0.001 (\*\*\*)).

47

48

Fig. 4A

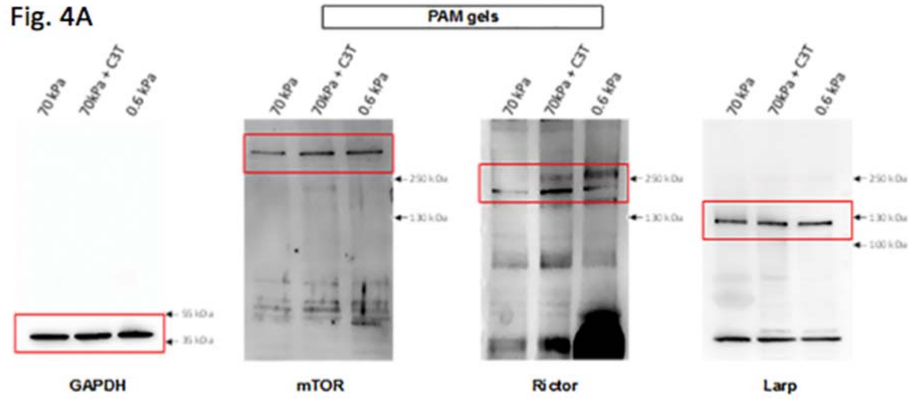

Fig. 4B

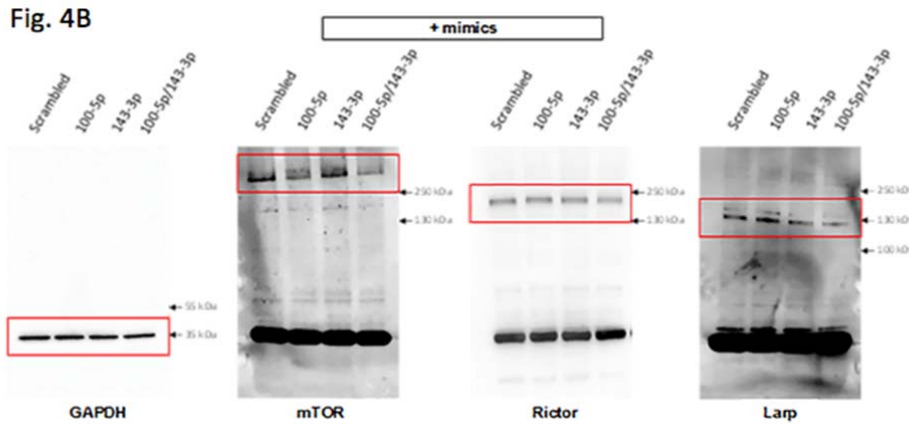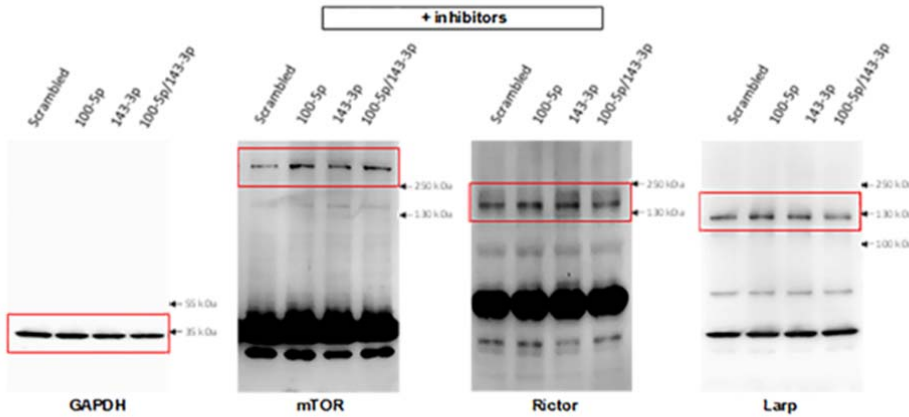

Fig. 4G

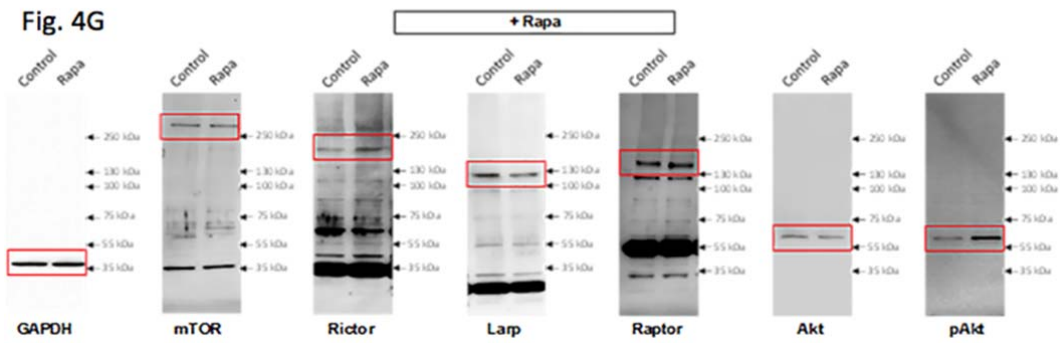

49

50 **Supplementary Figure 8.** Full scans of uncropped Western blots presented in the main figure.





52 **Supplementary Table 1. miRNAs upregulated in 70 kPa + C3T vs 70 kPa.**

| <b>miRNA</b>             | <b>logFC</b> | <b>logCPM</b> | <b>P Value</b> | <b>FDR</b>   |
|--------------------------|--------------|---------------|----------------|--------------|
| <i>hsa-mir-3929-3p</i>   | 5.5759784    | 5.353010      | 1.101922e-13   | 5.774073e-11 |
| <i>hsa-mir-3929</i>      | 4.4738797    | 5.569399      | 8.551213e-12   | 2.240418e-09 |
| <i>hsa-mir-5096-3p</i>   | 2.5543970    | 5.970366      | 3.714409e-07   | 4.865875e-05 |
| <i>hsa-mir-619-5p</i>    | 4.1287945    | 7.014513      | 3.289117e-06   | 3.173089e-04 |
| <i>hsa-mir-566-5p</i>    | 2.7488159    | 4.667838      | 7.156853e-06   | 5.357416e-04 |
| <i>hsa-mir-1285-1-5p</i> | 3.4135330    | 5.047673      | 1.481225e-04   | 9.702022e-03 |
| <i>hsa-mir-5096</i>      | 2.8533990    | 4.208759      | 2.562158e-04   | 1.464287e-02 |
| <i>hsa-mir-7851-5p</i>   | 5.5239765    | 5.879177      | 2.794442e-04   | 1.464287e-02 |
| <i>hsa-mir-5096-5p</i>   | 2.0439955    | 5.276739      | 3.451199e-04   | 1.644026e-02 |
| <i>hsa-mir-1273d-3p</i>  | 2.3882644    | 4.214999      | 4.330409e-04   | 1.890945e-02 |
| <i>hsa-mir-3159-3p</i>   | 2.0467889    | 5.990651      | 6.318541e-04   | 2.364939e-02 |
| <i>hsa-mir-4419a</i>     | 1.9017001    | 4.599033      | 7.185424e-04   | 2.510108e-02 |
| <i>hsa-mir-483-5p</i>    | 2.2338434    | 4.222222      | 1.530696e-03   | 4.595441e-02 |
| <i>hsa-mir-566-3p</i>    | 2.3271466    | 5.025884      | 1.578587e-03   | 4.595441e-02 |

53

54

55 **Supplementary Table 2. miRNAs downregulated in 70 kPa + C3T vs 70 kPa.**

| <b>miRNA</b>            | <b>logFC</b> | <b>logCPM</b> | <b>P Value</b> | <b>FDR</b>   |
|-------------------------|--------------|---------------|----------------|--------------|
| <i>hsa-mir-335-3p</i>   | -1.7669778   | 8.529429      | 3.214541e-08   | 5.614732e-06 |
| <i>hsa-mir-100-5p</i>   | -0.2792123   | 17.803562     | 3.633308e-06   | 3.173089e-04 |
| <i>hsa-mir-7974-3p</i>  | -2.6368929   | 4.672177      | 5.227040e-04   | 2.106899e-02 |
| <i>hsa-mir-1268b-5p</i> | -1.6934567   | 6.626036      | 9.941078e-04   | 3.255703e-02 |

56

57

58 **Supplementary Table 3. miRNAs upregulated in 0.6 kPa vs 70 kPa.**

| <b>miRNA</b>                  | <b>logFC</b> | <b>logCPM</b> | <b>P Value</b> | <b>FDR</b>   |
|-------------------------------|--------------|---------------|----------------|--------------|
| <i><b>hsa-mir-122-5p</b></i>  | 3.245741     | 5.981104      | 1.452461e-08   | 7.610898e-06 |
| <i><b>hsa-mir-4448-3p</b></i> | 1.444811     | 9.031696      | 1.041214e-04   | 2.727979e-02 |

59

60

61 **Supplementary Table 4. miRNAs upregulated in 0.6 kPa vs 70 kPa + C3T.**

| <b>miRNA</b>             | <b>logFC</b> | <b>logCPM</b> | <b>P Value</b> | <b>FDR</b>   |
|--------------------------|--------------|---------------|----------------|--------------|
| <i>hsa-mir-100-5p</i>    | 0.2974540    | 17.803562     | 8.222047e-08   | 8.616706e-06 |
| <i>hsa-mir-6131-3p</i>   | 1.0783050    | 15.120294     | 3.546137e-06   | 2.322720e-04 |
| <i>hsa-mir-4448-3p</i>   | 1.5794037    | 9.031696      | 2.989968e-05   | 1.424312e-03 |
| <i>hsa-mir-1180-3p</i>   | 0.9887903    | 8.566305      | 7.971763e-05   | 3.213234e-03 |
| <i>hsa-mir-7706-3p</i>   | 1.6518474    | 6.740006      | 2.252161e-04   | 6.211222e-03 |
| <i>hsa-mir-25-5p</i>     | 2.0540046    | 5.784007      | 5.785608e-04   | 1.263191e-02 |
| <i>hsa-mir-3615-3p</i>   | 0.8177897    | 8.702686      | 6.258842e-04   | 1.311853e-02 |
| <i>hsa-mir-122-5p</i>    | 1.6418679    | 5.981104      | 1.083907e-03   | 1.893225e-02 |
| <i>hsa-mir-3687-3p</i>   | 1.9865586    | 5.323219      | 1.959968e-03   | 3.209447e-02 |
| <i>hsa-mir-320b-2-3p</i> | 0.7504807    | 8.693615      | 2.212632e-03   | 3.410056e-02 |
| <i>hsa-mir-7974-3p</i>   | 2.3248083    | 4.672177      | 3.574127e-03   | 4.928533e-02 |

62

63

64 **Supplementary Table 5. miRNAs downregulated in 0.6 kPa vs 70 kPa + C3T**

| <b>miRNA</b>             | <b>logFC</b> | <b>logCPM</b> | <b>P Value</b> | <b>FDR</b>   |
|--------------------------|--------------|---------------|----------------|--------------|
| <i>hsa-mir-3929-3p</i>   | -4.4900459   | 5.353010      | 1.024551e-12   | 3.465906e-10 |
| <i>hsa-mir-3929</i>      | -4.2621572   | 5.569399      | 1.322865e-12   | 3.465906e-10 |
| <i>hsa-mir-619-5p</i>    | -4.2848277   | 7.014513      | 2.453039e-08   | 4.284641e-06 |
| <i>hsa-mir-5096-3p</i>   | -2.5041362   | 5.970366      | 4.044641e-08   | 5.298480e-06 |
| <i>hsa-mir-566-5p</i>    | -3.2134090   | 4.667838      | 1.694976e-07   | 1.480279e-05 |
| <i>hsa-mir-5096</i>      | -3.8722842   | 4.208759      | 8.528787e-07   | 6.384406e-05 |
| <i>hsa-mir-21-5p</i>     | -0.6454914   | 16.389694     | 8.286239e-06   | 4.824433e-04 |
| <i>hsa-mir-5096-5p</i>   | -2.3107125   | 5.276739      | 1.906115e-05   | 9.988041e-04 |
| <i>hsa-mir-3159-3p</i>   | -2.1983740   | 5.990651      | 4.601951e-05   | 2.009519e-03 |
| <i>hsa-mir-660-5p</i>    | -2.0389909   | 6.124728      | 9.497978e-05   | 3.554958e-03 |
| <i>hsa-mir-1273d-3p</i>  | -2.5101363   | 4.214999      | 1.328769e-04   | 4.641833e-03 |
| <i>hsa-mir-1285-1-5p</i> | -2.9187077   | 5.047673      | 1.518824e-04   | 4.974150e-03 |
| <i>hsa-mir-7851-5p</i>   | -4.5803584   | 5.879177      | 1.868686e-04   | 5.618112e-03 |
| <i>hsa-mir-382-3p</i>    | -1.4297022   | 7.143209      | 1.929886e-04   | 5.618112e-03 |
| <i>hsa-mir-136-3p</i>    | -2.5662955   | 4.665143      | 3.089401e-04   | 7.978467e-03 |
| <i>hsa-mir-337-3p</i>    | -1.5090304   | 6.466167      | 3.197477e-04   | 7.978467e-03 |
| <i>hsa-mir-146a-5p</i>   | -2.2848487   | 6.080851      | 4.821789e-04   | 1.148462e-02 |
| <i>hsa-mir-186-5p</i>    | -1.0251221   | 7.834047      | 5.105812e-04   | 1.163237e-02 |
| <i>hsa-mir-140-5p</i>    | -1.1710280   | -1.1710280    | 7.787207e-04   | 1.569422e-02 |
| <i>hsa-mir-1273a-5p</i>  | -2.0655408   | 4.491878      | 8.283748e-04   | 1.607661e-02 |
| <i>hsa-mir-21-3p</i>     | -1.4118082   | 6.715625      | 8.713034e-04   | 1.630582e-02 |
| <i>hsa-mir-376c-3p</i>   | -1.7264774   | 5.206281      | 9.740389e-04   | 1.759988e-02 |
| <i>hsa-mir-34a-5p</i>    | -1.2188259   | 7.278523      | 1.678721e-03   | 2.837581e-02 |

---

|                               |            |          |              |              |
|-------------------------------|------------|----------|--------------|--------------|
| <b><i>hsa-mir-494-3p</i></b>  | -0.8668309 | 8.376215 | 2.132062e-03 | 3.385456e-02 |
| <b><i>hsa-mir-195-5p</i></b>  | -1.7854635 | 4.869119 | 2.437922e-03 | 3.649918e-02 |
| <b><i>hsa-mir-8086-3p</i></b> | -2.5630816 | 6.122087 | 3.222029e-03 | 4.689842e-02 |
| <b><i>hsa-mir-656-3p</i></b>  | -2.1238426 | 4.190869 | 3.449753e-03 | 4.885597e-02 |

---

65

66

67 **Supplementary Table 6. miRNAs upregulated in [70 kPa + C3T and 0.6 kPa] vs 70 kPa.**

| <b>miRNA</b>           | <b>logFC</b> | <b>logCPM</b> | <b>P Value</b> | <b>FDR</b> |
|------------------------|--------------|---------------|----------------|------------|
| <i>hsa-mir-3929-3p</i> | 4.34775      | 5.35301       | 3.03E-09       | 1.59E-06   |
| <i>hsa-mir-3929</i>    | 3.2717       | 5.569399      | 9.51E-08       | 2.49E-05   |
| <i>hsa-mir-122-5p</i>  | 2.770195     | 5.981104      | 7.97E-07       | 1.04E-04   |
| <i>hsa-mir-619-5p</i>  | 2.915437     | 7.014513      | 2.79E-04       | 2.92E-02   |
| <i>hsa-mir-5096-3p</i> | 1.583912     | 5.970366      | 5.19E-04       | 4.53E-02   |

68

69



70 **Supplementary Table 7. miRNAs downregulated in [70 kPa + C3T and 0.6 kPa] vs 70 kPa.**

| miRNA                 | logFC     | logCPM   | P Value  | FDR      |
|-----------------------|-----------|----------|----------|----------|
| <i>hsa-mir-335-3p</i> | -1.236386 | 8.529429 | 3.26E-07 | 5.69E-05 |

71

72

73 **Supplementary Table 8. miRNAs upregulated in 0.6 kPa vs [70 kPa and 70 kPa + C3T].**

| <b>miRNA</b>           | <b>logFC</b> | <b>logCPM</b> | <b>P Value</b> | <b>FDR</b> |
|------------------------|--------------|---------------|----------------|------------|
| <i>hsa-mir-3929-3p</i> | 3.433864     | 5.35301       | 5.61E-09       | 1.97E-06   |
| <i>hsa-mir-3929</i>    | 3.2540579    | 5.569399      | 7.50E-09       | 1.97E-06   |
| <i>hsa-mir-619-5p</i>  | 3.3575916    | 7.014513      | 1.81E-06       | 1.58E-04   |
| <i>hsa-mir-21-5p</i>   | 0.5578685    | 16.389694     | 7.11E-06       | 5.32E-04   |
| <i>hsa-mir-5096-3p</i> | 1.6641658    | 5.970366      | 4.96E-05       | 3.25E-03   |
| <i>hsa-mir-566-5p</i>  | 2.2932767    | 4.667838      | 8.58E-05       | 5.00E-03   |
| <i>hsa-mir-660-5p</i>  | 1.7911026    | 6.124728      | 1.23E-04       | 6.42E-03   |
| <i>hsa-mir-5096</i>    | 2.960036     | 4.208759      | 1.35E-04       | 6.42E-03   |
| <i>hsa-mir-382-3p</i>  | 1.171821     | 7.143209      | 4.40E-04       | 1.92E-02   |
| <i>hsa-mir-136-3p</i>  | 2.1956999    | 4.665143      | 4.82E-04       | 1.94E-02   |
| <i>hsa-mir-494-3p</i>  | 0.7947635    | 8.376215      | 1.08E-03       | 3.76E-02   |
| <i>hsa-mir-5096-5p</i> | 1.5545034    | 5.276739      | 1.29E-03       | 4.13E-02   |
| <i>hsa-mir-7851-5p</i> | 3.6124295    | 5.879177      | 1.34E-03       | 4.13E-02   |
| <i>hsa-mir-21-3p</i>   | 1.1892173    | 6.715625      | 1.43E-03       | 4.17E-02   |
| <i>hsa-mir-143-3p</i>  | 0.6391022    | 15.017312     | 1.70E-03       | 4.46E-02   |
| <i>hsa-mir-337-3p</i>  | 1.144301     | 6.466167      | 2.06E-03       | 4.75E-02   |
| <i>hsa-mir-186-5p</i>  | 0.7785284    | 7.834047      | 2.08E-03       | 4.75E-02   |

74

75

76 **Supplementary Table 9. miRNAs downregulated in 0.6 kPa vs [70 kPa and 70 kPa + C3T]**

| <b>miRNA</b>             | <b>logFC</b> | <b>logCPM</b> | <b>P Value</b> | <b>FDR</b> |
|--------------------------|--------------|---------------|----------------|------------|
| <i>hsa-mir-122-5p</i>    | -2.3200241   | 5.981104      | 5.40E-08       | 9.44E-06   |
| <i>hsa-mir-4448-3p</i>   | -1.5091103   | 9.031696      | 3.32E-07       | 4.34E-05   |
| <i>hsa-mir-6131-3p</i>   | -0.9025831   | 15.120294     | 1.21E-06       | 1.26E-04   |
| <i>hsa-mir-100-5p</i>    | -0.1509109   | 17.803562     | 9.99E-04       | 3.74E-02   |
| <i>hsa-mir-320b-2-3p</i> | -0.6169668   | 8.693615      | 1.60E-03       | 4.41E-02   |
| <i>hsa-mir-320a-5p</i>   | -1.3021374   | 6.746814      | 2.05E-03       | 4.75E-02   |

77

78

79 **Supplementary Table 10. Composition for polyacrylamide (PAM) hydrogels.**

|                     | <b>Soft (0.6 kPa) PAM gels</b> | <b>Stiff (70 kPa) PAM gels</b> |
|---------------------|--------------------------------|--------------------------------|
| Acrylamide [30%]    | 50 $\mu$ l                     | 200 $\mu$ l                    |
| Bis-Acrylamide [1%] | 75 $\mu$ l                     | 300 $\mu$ l                    |
| dH <sub>2</sub> O   | 375 $\mu$ l                    | N/A                            |
| TEMED               | 1.25 $\mu$ l                   | 1.25 $\mu$ l                   |
| APS [10%]           | 3.75 $\mu$ l                   | 3.75 $\mu$ l                   |

80 *APS: ammonium persulfate. TEMED: N, N, N', N'-Tetramethylethylenediamine.*

81 **Supplementary Table 11. qPCR forward and reverse primer sequences used in this study.**

|               | <b>Forward 5'-3'</b>    | <b>Reverse 3'-5'</b>   |
|---------------|-------------------------|------------------------|
| <i>GAPDH</i>  | ATGGGGAAGGTGAAGGTCG     | TAAAAGCAGCCCTGGTGACC   |
| <i>RPS27a</i> | TGGATGAGAATGGCAAATTAGTC | CACCCCAGCACCACATTCA    |
| <i>mTOR</i>   | CAGAAGGTGGAGGTGTTTGAG   | TGACATGACCGCTAAAGAACG  |
| <i>TRIB1</i>  | TTGGGGACATGCACTCCTATG   | GGCGGAGACAATCTGCTTGA   |
| <i>TRIB2</i>  | GACTCCGAACCTTGTCGCATTG  | GGCACGAAAAACGTGGTCT    |
| <i>THAP2</i>  | GGCTGTGCCACTACCTACAAC   | CAGGCGAACCCATTCTTTTCTT |
| <i>RICTOR</i> | AGAAGCACGATTTCTAGCCAGT  | AGTAGACCTCGCCTTATTTCCA |
| <i>LARP1</i>  | GGTTCAGCAAGTTCCTAC      | ATCCAGTGTCCGTCCTTC     |

82 *GAPDH: glyceraldehyde-3-phosphate dehydrogenase. RPS27a: ribosomal protein S27a.*  
83 *mTOR: mechanistic target of rapamycin. TRIB1: tribbles pseudokinase 1. TRIB2: tribbles*  
84 *pseudokinase 2. THAP2: THAP domain containing 2. RICTOR: RPTOR independent companion*  
85 *of MTOR complex 2. LARP1: La ribonucleoprotein domain family member 1.*

86

87 **Supplementary Table 12. Details of Exiqon miRNA mimics and miR inhibitors used in this**  
 88 **study.**

|                                       | <b>miRNA mimic</b> | <b>miRNA inhibitor</b> |
|---------------------------------------|--------------------|------------------------|
| Mimic negative control, FAM labelled  | 479995-011         | -                      |
| miRNA inhibitor control, FITC labeled | -                  | 199006-011             |
| <i>hsa-miR-100-5p</i>                 | 472477-001         | 4104079-001            |
| <i>hsa-miR-122-5p</i>                 | 470430-001         | 4104657-001            |
| <i>hsa-miR-143-3p</i>                 | 470035-001         | 4101245-001            |
| <i>hsa-miR-21-5p</i>                  | 473093-001         | 4102261-001            |
| <i>hsa-miR-335-3p</i>                 | 472642-001         | 4103230-001            |

89

90
