# Supplementary material for: Mechanically-sensitive miRNAs bias human mesenchymal stem cell fate via mTOR signalling
Source: PubMed Central journal article supplement (PMC5772625; doi:10.1038/s41467-017-02486-0), 2018-01-17
Supplement: 41467_2017_2486_MOESM2_ESM.pdf [file 41467_2017_2486_MOESM2_ESM.pdf]

## **Description of Additional Supplementary Files**

File Name: Supplementary Data 1

Description: "Canonical pathways" enriched in predicted targets of differentially expressed miRNAs between 70 kPa and 70 kPa + C3T.

File Name: Supplementary Data 2

Description: "Canonical pathways" enriched in predicted targets of differentially expressed miRNAs between 70 kPa and 0.6 kPa.

File Name: Supplementary Data 3

Description: "Canonical pathways" enriched in predicted targets of differentially expressed miRNAs between 0.2kPa and 40kPa + C3T.
